# Supplementary material for: Progressive Changes in Sleep and Its Relations to Amyloid-β Distribution and Learning in Single App Knock-In Mice
Source: eNeuro. 2020 Apr 29;7(2):ENEURO.0093-20.2020. doi: 10.1523/ENEURO.0093-20.2020 (PMC7196722; doi:10.1523/ENEURO.0093-20.2020)
Supplement: Extended Data Figure 2-1 — Detailed results of the statistical analyses in Figure 2. Download Figure 2-1, XLSX file. [file enu-eN-NWR-0093-20-s03.xlsx]

## Sheet: Extended Data Figure 2-1
	Extended Data Figure 2-1. Detailed results of the statistical analyses in Figure 2.
	Figure number	Sample size (n)	Mixed ANOVA	Games-Howell
	2A (Wake)	WT: n= 12 mice; AppNL-G-F/wt: n= 11 mice; AppNL-G-F/NL-G-F: n= 8 mice	time: F(11,308)= 105.702, P=0.000 time*genotype:F(22,308)= 1.068, P=0.381 genotype : F(2,28)= 0.540, P=0.589	n.a.
	2A (NREMS)		time: F(11,308)= 93.267, P=0.000 time*genotype:F(22,308)= 0.966, P=0.508 genotype : F(2,28)= 0.748, P=0.483	n.a.
	2A (REMS)		time: F(11,308)= 99.036, P=0.000 time*genotype: F(22,308)= 1.669, P=0.032 genotype : F(2,28)=5.040, P=0.014	WT vs AppNL-G-F/wt: ZT 2: t(20.921)=0.195, P=0.979, 95% CI: -1.547, 1.808, ZT 4: t(17.299)=0.758, P=0.733 , 95% CI: -2.188, 1.189, ZT 6: t(19.962)=1.369, P=0.375, 95% CI: -0.568, 1.907, ZT 8: t(16.122)=1.357, P=0.385, 95% CI: -1.659, 0.514, ZT 10: t(19.771)=0.455, P=0.893, 95% CI: -0.812, 1.168, ZT 12: t(19.623)=0.210, P=0.976, 95% CI: -0.989, 1.168, ZT 14: t(18.352)=1.150, P=0.497, 95% CI: -0.22…
				WT vs AppNL-G-F/NL-G-F: ZT 2: t(16.939)=1.372, P=0.377, 95% CI: -2.790, 0.846, ZT 4: t(17.698)=3.930, P=0.003 , 95% CI: -3.127, -0.662, ZT 6: t(13.373)=1.047, P=0.561, 95% CI: -1.972, 0.847, ZT 8: t(14.528)=1.257, P=0.440, 95% CI: -1.579, 0.551 , ZT 10: t(14.814)=1.308, P=0.413, 95% CI: -1.984, 0.656, ZT 12: t(16.958)=1.457, P=0.336, 95% CI: -1.530, 0.422, ZT 14: t(17.689)=0.256, P=0.965, 95% CI:…
				AppNL-G-F/wt vs AppNL-G-F/NL-G-F: ZT 2: t(15.493)=1.637, P=0.261, 95% CI: -2.846, 0.641, ZT 4: t(15.434)=2.172, P=0.108 , 95% CI: -3.058, 0.269, ZT 6: t(15.321)=2.139, P=0.115, 95% CI: -2.725, 0.261, ZT 8: t(17.000)=0.236, P=0.970, 95% CI: -0.575, 0.692, ZT 10: t(11.623)=1.827, P=0.204, 95% CI: -2.076, 0.393, ZT 12: t(16.992)=1.500, P=0.316, 95% CI: -1.744, 0.457, ZT 14: t(16.079)=1.391, P=0.369,…
	2B (Wake)	WT: n= 10 mice; AppNL-G-F/wt: n= 12 mice; AppNL-G-F/NL-G-F: n= 13 mice	time: F(11,352)= 86.674, P=0.000 time*genotype: F(22,352)= 1.401, P=0.110 genotype : F(2,32)=4.591. P=0.018 P=0.018	n.a.
	2B (NREMS)		time: F(11,352)= 77.379, P=0.000 time*genotype: F(22,352)= 1.521, P=0.064 genotype : F(2,32)=2.637, P=0.087	n.a.
	2B (REMS)		time: F(11,352)= 103.011, P=0.000 time*genotype: F(22,352)= 2.720, P=0.000 genotype : F(2,32)=20.638, P=0.000	WT vs AppNL-G-F/wt: ZT 2: t(19.924)=1.604, P=0.267, 95% CI: -1.720, 0.386, ZT 4: t(17.755)=0.745, P=0.741 , 95% CI: -0.920, 1.676, ZT 6: t(18.881)=0.440, P=0.900, 95% CI: -1.556, 1.907, ZT 8: t(19.393)=1.099, P=0.526, 95% CI: -1.520, 0.601, ZT 10: t(18.113)=1.110, P=0.520, 95% CI: -1.713, 0.675, ZT 12: t(19.987)=0.994, P=0.589, 95% CI: -0.511, 1.174, ZT 14: t(16.331)=0.636, P=0.803, 95% CI: -0.42…
				WT vs AppNL-G-F/NL-G-F: ZT 2: t(19.926)=4.720, P=0.000, 95% CI: -2.837, -0.857, ZT 4: t(14.079)=4.027, P=0.003 , 95% CI: -3.033, -0.645, ZT 6: t(18.721)=2.769, P=0.032, 95% CI: -2.703, -0.115, ZT 8: t(17.999)=2.975, P=0.021, 95% CI: -2.135, -0.163, ZT 10: t(14.753)=2.669, P=0.044, 95% CI: -2.225, -0.028, ZT 12: t(20.986)=2.276, P=0.082, 95% CI: -1.590, 0.08, ZT 14:t(20.811)=0.231, P=0.971, 95% CI…
				AppNL-G-F/wt vs AppNL-G-F/NL-G-F: ZT 2: t(22.364)=2.952, P=0.019, 95% CI: -2.183, -0.177, ZT 4: t(19.971)=5.862, P=0.000 , 95% CI: -3.174, -1.260 E13, ZT 6: t(22.746)=2.514, P=0.049, 95% CI: -2.355, -0.004, ZT 8: t(21.819)=1.871, P=0.171, 95% CI: -1.616, 0.237, ZT 10: t(20.377)=1.686, P=0.234, 95% CI: -1.518, 0.303, ZT 12: t(22.939)=3.085, P=0.014, 95% CI: -1.967, -0.204, ZT 14: t(19.399)=0.435, …
	2C (Wake)	6-month-old mice: WT: n= 12 mice; AppNL-G-F/wt: n= 11 mice; AppNL-G-F/NL-G-F: n= 8 mice; 12-month-old mice: WT: n= 10 mice; AppNL-G-F/wt: n= 12 mice; AppNL-G-F/NL-G-F: n= 13 mice	n.a.	6 months: WT vs AppNL-G-F/wt: t(19.329)=1.142, P=0.501, 95% CI: -28.961, 76.372 WT vs AppNL-G-F/NL-G-F: t(11.451)=0.301, P=0.951, 95% CI: -61.347, 76.836 AppNL-G-F/wt vs AppNL-G-F/NL-G-F: t(13.775)=0.574, P=0.836, 95% CI: -88.800, 56.883 12 months: WT vs AppNL-G-F/wt: t(18.638)=0.433, P=0.902, 95% CI: -76.865, 54.509 WT vs AppNL-G-F/NL-G-F: t(19.493)=3.478, P=0.007, 95% CI: 18.169, 115.882 AppNL-…
	2C (NREMS)		n.a.	6 months: WT vs AppNL-G-F/wt: t(19.728)=1.106, P=0.521, 95% CI: -70.350, 27.573 WT vs AppNL-G-F/NL-G-F: t(11.674)=0.129, P=0.991, 95% CI: -61.811, 68.083 AppNL-G-F/wt vs AppNL-G-F/NL-G-F: t(13.525)=0.951, P=0.619, 95% CI: -43.249,92.299 12 months: WT vs AppNL-G-F/wt: t(18.523)=0.416, P=0.909, 95% CI: -55.238, 76.831 WT vs AppNL-G-F/NL-G-F: t(19.301)=2.596, P=0.044, 95% CI: -97.640, -1.113 AppNL-G…
	2C (REMS)		n.a.	6 months: WT vs AppNL-G-F/wt: t(20.008)=0.783, P=0.717, 95% CI: -9.801, 5.167 WT vs AppNL-G-F/NL-G-F: t(11.537)=2.842, P=0.038, 95% CI: -21.154, -0.612 AppNL-G-F/wt vs AppNL-G-F/NL-G-F: t(13.050)=2.129, P=0.112, 95% CI: -19.187,2.053 12 months: WT vs AppNL-G-F/wt: t(15.980)=0.112, P=0.993, 95% CI: -8.277, 9.028 WT vs AppNL-G-F/NL-G-F: t(20.574)=7.082, P=0.000, 95% CI: -23.989, -11.310 AppNL-G-F/w…
	2C (REMS/Total sleep ratio)		n.a.	6 months: WT vs AppNL-G-F/wt: t(20.997)=0.068, P=0.997, 95% CI: -0.009, 0.008 WT vs AppNL-G-F/NL-G-F: t(12.170)=2.891, P=0.033, 95% CI: -0.026, -0.001 AppNL-G-F/wt vs AppNL-G-F/NL-G-F: t(11.557)=2.886, P=0.035, 95% CI: -0.026, -0.001 12 months: WT vs AppNL-G-F/wt: t(15.934)=0.003, P=1.000, 95% CI: -0.014,0.014 WT vs AppNL-G-F/NL-G-F: t(20.879)=4.877, P=0.000, 95% CI: -0.028, -0.009 AppNL-G-F/wt v…
	2D (Wake)	6-month-old mice: WT: n= 12 mice; AppNL-G-F/wt: n= 11 mice; AppNL-G-F/NL-G-F: n= 8 mice; 12-month-old mice: WT: n= 10 mice; AppNL-G-F/wt: n= 12 mice; AppNL-G-F/NL-G-F: n= 13 mice	n.a.	6 months: WT vs AppNL-G-F/wt: t(20.859)=1.491, P=0.315, 95% CI: -32.670, 8.391 WT vs AppNL-G-F/NL-G-F: t(15.572)=0.859, P=0.673, 95% CI: -32.593, 16.343 AppNL-G-F/wt vs AppNL-G-F/NL-G-F: t(13.922)=0.446, P=0.897, 95% CI: -19.532, 27.561 12 months: WT vs AppNL-G-F/wt: t(19.886)=0.424, P=0.906, 95% CI: -22.280,31.253 WT vs AppNL-G-F/NL-G-F: t(20.962)=2.292, P=0.079, 95% CI: -2.430,51.198 AppNL-G-F/…
	2D (NREMS)		n.a.	6 months: WT vs AppNL-G-F/wt: t(20.995)=1.567, P=0.282, 95% CI: -7.397, 31.696 WT vs AppNL-G-F/NL-G-F: t(14.567)=2.026, P=0.141, 95% CI: -5.279, 42.173 AppNL-G-F/wt vs AppNL-G-F/NL-G-F: t(13.976)=0.700, P=0.767, 95% CI: -17.255, 29.851 12 months: WT vs AppNL-G-F/wt: t(18.985)=0.221, P=0.973, 95% CI: -28.983,24.343 WT vs AppNL-G-F/NL-G-F: t(20.709)=0.831, P=0.689, 95% CI: -33.492,16.903 AppNL-G-F/…
	2D (REMS)		n.a.	6 months: WT vs AppNL-G-F/wt: t(20.507)=0.004, P=1.000, 95% CI: -6.434, 6.414 WT vs AppNL-G-F/NL-G-F: t(17.940)=3.995, P=0.002, 95% CI: -16.918, -3.726 AppNL-G-F/wt vs AppNL-G-F/NL-G-F: t(16.231)=4.452, P=0.001, 95% CI: -16.280, -4.344 12 months: WT vs AppNL-G-F/wt: t(19.905)=0.788, P=0.714, 95% CI: -9.147,4.802 WT vs AppNL-G-F/NL-G-F: t(20.300)=6.534, P=0.000, 95% CI: -22.313,-9.867 AppNL-G-F/wt…
	2D (REMS/Total sleep ratio)		n.a.	6 months: WT vs AppNL-G-F/wt: t(20.950)=0.560, P=0.843, 95% CI: -0.015, 0.010 WT vs AppNL-G-F/NL-G-F: t(17.493)=4.502, P=0.001, 95% CI: -0.035, -0.010 AppNL-G-F/wt vs AppNL-G-F/NL-G-F: t(16.214)=4.149, P=0.002, 95% CI: -0.032, -0.007 12 months: WT vs AppNL-G-F/wt: t(18.679)=0.556, P=0.845, 95% CI: -0.017,0.011 WT vs AppNL-G-F/NL-G-F: t(20.949)=6.185, P=0.000, 95% CI: -0.041,-0.017 AppNL-G-F/wt vs…
	2E (Wake)	6-month-old mice: WT: n= 12 mice; AppNL-G-F/wt: n= 11 mice; AppNL-G-F/NL-G-F: n= 8 mice; 12-month-old mice: WT: n= 10 mice; AppNL-G-F/wt: n= 12 mice; AppNL-G-F/NL-G-F: n= 13 mice	n.a.	6 months: WT vs AppNL-G-F/wt: t(20.207)=1.878, P=0.171, 95% CI: -12.400, 84.090 WT vs AppNL-G-F/NL-G-F: t(10.617)=0.577, P=0.835, 95% CI: -58.802,90.546 AppNL-G-F/wt vs AppNL-G-F/NL-G-F: t(11.728)=0.701, P=0.767, 95% CI: -96.188, 56.243 12 months: WT vs AppNL-G-F/wt: t(20.000)=0.668, P=0.785, 95% CI: -75.033,43.704 WT vs AppNL-G-F/NL-G-F: t(19.336)=2.047, P=0.128, 95% CI: -10.192,95.475 AppNL-G-F…
	2E (NREMS)		n.a.	6 months: WT vs AppNL-G-F/wt: t(20.055)=1.917, P=0.160, 95% CI: -77.785, 10.708 WT vs AppNL-G-F/NL-G-F: t(10.480)=0.605, P=0.821, 95% CI: -84.219,53.597 AppNL-G-F/wt vs AppNL-G-F/NL-G-F: t(11.723)=0.692, P=0.772, 95% CI: -52.238, 88.693 12 months: WT vs AppNL-G-F/wt: t(19.967)=0.591, P=0.826, 95% CI: -43.035,69.269 WT vs AppNL-G-F/NL-G-F: t(19.797)=2.096, P=0.116, 95% CI: -90.720,8.556 AppNL-G-F/…
	2E (REMS)		n.a.	6 months: WT vs AppNL-G-F/wt: t(20.706)=0.931, P=0.627, 95% CI: -8.557, 3.944 WT vs AppNL-G-F/NL-G-F: t(12.809)=0.182, P=0.982, 95% CI: -8.702,7.580 AppNL-G-F/wt vs AppNL-G-F/NL-G-F: t(13.368)=0.554, P=0.846, 95% CI: -6.538, 10.029 12 months: WT vs AppNL-G-F/wt: t(19.442)=1.072, P=0.542, 95% CI: -3.480,8.576 WT vs AppNL-G-F/NL-G-F: t(13.128)=0.977, P=0.603, 95% CI: -5.768,2.649 AppNL-G-F/wt vs Ap…
	2E (REMS/Total sleep ratio)		n.a.	6 months: WT vs AppNL-G-F/wt: t(19.372)=0.295, P=0.953, 95% CI: -0.023, 0.018 WT vs AppNL-G-F/NL-G-F: t(11.661)=0.014, P=1.000, 95% CI: -0.027,0.027 AppNL-G-F/wt vs AppNL-G-F/NL-G-F: t(13.888)=0.211, P=0.976, 95% CI: -0.026, 0.031 12 months: WT vs AppNL-G-F/wt: t(16.774)=1.262, P=0.435, 95% CI: -0.011, 0.031 WT vs AppNL-G-F/NL-G-F: t(17.319)=0.031, P=0.999, 95% CI: -0.012, 0.012 AppNL-G-F/wt vs A…
	2F (Wake)	6-month-old mice: WT: n= 12 mice; AppNL-G-F/wt: n= 11 mice; AppNL-G-F/NL-G-F: n= 8 mice; 12-month-old mice: WT: n= 10 mice; AppNL-G-F/wt: n= 12 mice; AppNL-G-F/NL-G-F: n= 13 mice	n.a.	6 months: WT vs AppNL-G-F/wt: t(20.888)=1.624, P=0.258, 95% CI: -123.091, 26.667 WT vs AppNL-G-F/NL-G-F: t(15.519)=2.773, P=0.035, 95% CI: -184.733, -6.350 AppNL-G-F/wt vs AppNL-G-F/NL-G-F: t(13.961)=1.440, P=0.349, 95% CI: -133.404, 38.745 12 months: WT vs AppNL-G-F/wt: t(18.040)=0.438, P=0.900, 95% CI: -104.535, 73.902 WT vs AppNL-G-F/NL-G-F: t(19.341)=2.317, P=0.077, 95% CI: -175.597, 7.951 Ap…
	2F (NREMS)		n.a.	6 months: WT vs AppNL-G-F/wt: t(20.396)=1.551, P=0.289, 95% CI: -126.873, 30.327 WT vs AppNL-G-F/NL-G-F: t(17.237)=2.583, P=0.048, 95% CI: -175.296, -0.704 AppNL-G-F/wt vs AppNL-G-F/NL-G-F: t(14.797)=1.290, P=0.422, 95% CI: -119.834, 40.379 12 months: WT vs AppNL-G-F/wt: t(19.652)=0.520, P=0.863, 95% CI: -100.819, 66.485 WT vs AppNL-G-F/NL-G-F: t(20.511)=2.673, P=0.037, 95% CI: -173.525, -4.937 A…
	2F (REMS)		n.a.	6 months: WT vs AppNL-G-F/wt: t(16.191)=0.589, P=0.828, 95% CI: -20.745, 33.032 WT vs AppNL-G-F/NL-G-F: t(17.152)=1.180, P=0.480, 95% CI: -27.626, 10.210 AppNL-G-F/wt vs AppNL-G-F/NL-G-F: t(15.334)=1.426, P=0.353, 95% CI: -41.851, 12.147 12 months: WT vs AppNL-G-F/wt: t(16.965)=0.209, P=0.976, 95% CI: -27.211, 23.111 WT vs AppNL-G-F/NL-G-F: t(11.198)=1.836, P=0.203, 95% CI: -38.227, 7.243 AppNL-G…
	2G (Wake)	6-month-old mice: WT: n= 12 mice; AppNL-G-F/wt: n= 11 mice; AppNL-G-F/NL-G-F: n= 8 mice; 12-month-old mice: WT: n= 10 mice; AppNL-G-F/wt: n= 12 mice; AppNL-G-F/NL-G-F: n= 13 mice	n.a.	6 months: WT vs AppNL-G-F/wt: t(18.041)=1.806, P=0.196, 95% CI: -18.278, 106.868 WT vs AppNL-G-F/NL-G-F: t(8.300)=1.961, P=0.182, 95% CI: -41.966, 229.966 AppNL-G-F/wt vs AppNL-G-F/NL-G-F: t(9.720)=0.991, P=0.599, 95% CI: -88.377, 187.786 12 months: WT vs AppNL-G-F/wt: t(15.910)=0.462, P=0.890, 95% CI: -61.497, 88.297 WT vs AppNL-G-F/NL-G-F: t(17.712)=3.149, P=0.015, 95% CI: -16.501, 158.607 AppN…
	2G (NREMS)		n.a.	6 months: WT vs AppNL-G-F/wt: t(20.936)=0.639, P=0.800, 95% CI: -24.387, 40.948 WT vs AppNL-G-F/NL-G-F: t(13.966)=2.196, P=0.107, 95% CI: -6.525, 74.359 AppNL-G-F/wt vs AppNL-G-F/NL-G-F: t(13.829)=1.655, P=0.257, 95% CI: -14.960, 66.233 12 months: WT vs AppNL-G-F/wt: t(19.761)=0.962, P=0.609, 95% CI: -10.751, 23.917 WT vs AppNL-G-F/NL-G-F: t(20.555)=1.977, P=0.143, 95% CI: -3.762, 30.916 AppNL-G-…
	2G (REMS)		n.a.	6 months: WT vs AppNL-G-F/wt: t(19.779)=0.874, P=0.663, 95% CI: -8.513, 4.145 WT vs AppNL-G-F/NL-G-F: t(11.565)=0.929, P=0.634, 95% CI: -11.468, 5.568 AppNL-G-F/wt vs AppNL-G-F/NL-G-F: t(13.343)=0.227, P=0.972, 95% CI: -9.631, 8.099 12 months: WT vs AppNL-G-F/wt: t(19.968)=0.109, P=0.993, 95% CI: -3.728, 4.065 WT vs AppNL-G-F/NL-G-F: t(20.880)=3.768, P=0.003, 95% CI: -9.305, -1.844 AppNL-G-F/wt v…
	2H (REMS latency)	6-month-old mice: WT: n= 12 mice; AppNL-G-F/wt: n= 11 mice; AppNL-G-F/NL-G-F: n= 8 mice; 12-month-old mice: WT: n= 10 mice; AppNL-G-F/t: n= 12 mice; AppNL-G-F/NL-G-F: n= 13 mice	n.a.	6 months: WT vs AppNL-G-F/wt: t(20.215)=0.666, P=0.786, 95% CI: -30.097, 17.549 WT vs AppNL-G-F/NL-G-F: t(16.265)=1.805, P=0.199, 95% CI: -7.052, 40.058 AppNL-G-F/wt vs AppNL-G-F/NL-G-F: t(16.740)=2.314, P=0.081, 95% CI: -2.506, 48.061 12 months: WT vs AppNL-G-F/wt: t(19.990)=0.249, P=0.966, 95% CI: -12.684, 15.458 WT vs AppNL-G-F/NL-G-F: t(20.620)=0.745, P=0.740, 95% CI: -10.905, 20.033 AppNL-G-…
