# Supplementary material for: Progressive Changes in Sleep and Its Relations to Amyloid-β Distribution and Learning in Single App Knock-In Mice
Source: eNeuro. 2020 Apr 29;7(2):ENEURO.0093-20.2020. doi: 10.1523/ENEURO.0093-20.2020 (PMC7196722; doi:10.1523/ENEURO.0093-20.2020)
Supplement: Extended Data Figure 3-1 — Detailed results of the statistical analyses in Figure 3. Download Figure 3-1, XLSX file. [file enu-eN-NWR-0093-20-s04.xlsx]

## Sheet: Extended Data Figure 3-1
	Extended Data Figure 3-1. Detailed results of the statistical analyses in Figure 3.
	Figure number	Sample size (n)	Games-Howell
	3C (Wake)	6-month-old mice: WT: n= 12 mice; AppNL-G-F/wt: n= 11 mice; AppNL-G-F/NL-G-F: n= 8 mice; 12-month-old mice: WT: n= 10 mice; AppNL-G-F/wt: n= 12 mice; AppNL-G-F/NL-G-F: n= 13 mice	6 months: WT vs AppNL-G-F/wt: t(14.968)=0.255, P=0.965, 95% CI: -2.747, 3.343 WT vs AppNL-G-F/NL-G-F: t(12.634)=3.685, P=0.008, 95% CI: 1.019, 6.233 AppNL-G-F/wt vs AppNL-G-F/NL-G-F: t(16.952)=2.498, P=0.057, 95% CI: -0.090, 6.745 12 months: WT vs AppNL-G-F/wt: t(19.907)=0.456, P=0.892, 95% CI: -2.249, 3.238 WT vs AppNL-G-F/NL-G-F: t(20.780)=4.853, P=0.000, 95% CI: -2.652, 8.391 AppNL-G-F/wt vs A…
	3D (NREMS)	6-month-old mice: WT: n= 12 mice; AppNL-G-F/wt: n= 11 mice; AppNL-G-F/NL-G-F: n= 8 mice; 12-month-old mice: WT: n= 10 mice; AppNL-G-F/wt: n= 12 mice; AppNL-G-F/NL-G-F: n= 13 mice	6 months: WT vs AppNL-G-F/wt: t(20.319)=1.601, P=0.268, 95% CI: -8.264, 1.854 WT vs AppNL-G-F/NL-G-F: t(18.000)=1.776, P=0.206, 95% CI: -8.680, 1.557 AppNL-G-F/wt vs AppNL-G-F/NL-G-F: t(16.445)=0.202, P=0.978, 95% CI: -4.886, 4.173 12 months: WT vs AppNL-G-F/wt: t(19.999)=1.958, P=0.149, 95% CI: -0.745, 5.851 WT vs AppNL-G-F/NL-G-F: t(20.174)=5.358, P=0.000, 95% CI: 4.306, 12.001 AppNL-G-F/wt vs …
	3E (REMS)	6-month-old mice: WT: n= 12 mice; AppNL-G-F/wt: n= 11 mice; AppNL-G-F/NL-G-F: n= 8 mice; 12-month-old mice: WT: n= 10 mice; AppNL-G-F/wt: n= 12 mice; AppNL-G-F/NL-G-F: n= 13 mice	6 months: WT vs AppNL-G-F/wt: t(20.837)=1.045, P=0.558, 95% CI: -1.676, 0.694 WT vs AppNL-G-F/NL-G-F: t(13.042)=3.477, P=0.011, 95% CI: 0.533, 3.887 AppNL-G-F/wt vs AppNL-G-F/NL-G-F: t(11.660)=4.417, P=0.002, 95% CI: 1.063, 4.338 12 months: WT vs AppNL-G-F/wt: t(18.868)=0.501, P=0.861, 95% CI: -1.591, 2.417 WT vs AppNL-G-F/NL-G-F: t(19.745)=1.791, P=0.005, 95% CI: 1.152, 6.630 AppNL-G-F/wt vs App…
	3F (Wake)	6-month-old mice: WT: n= 12 mice; AppNL-G-F/wt: n= 11 mice; AppNL-G-F/NL-G-F: n= 8 mice; 12-month-old mice: WT: n= 10 mice; AppNL-G-F/wt: n= 12 mice; AppNL-G-F/NL-G-F: n= 13 mice	6 months: WT vs AppNL-G-F/wt: t(14.525)=1.897, P=0.175, 95% CI: -0.590, 3.747 WT vs AppNL-G-F/NL-G-F: t(8.971)=1.514, P=0.330, 95% CI: -1.330, 4.476 AppNL-G-F/wt vs AppNL-G-F/NL-G-F: t(14.240)=0.004, P=1.000, 95% CI: -3.214, 3.203 12 months: WT vs AppNL-G-F/wt: t(16.838)=0.866, P=0.668, 95% CI: -3.896, 1.930 WT vs AppNL-G-F/NL-G-F: t(14.927)=0.346, P=0.936, 95% CI: -2.417, 3.160 AppNL-G-F/wt vs A…
	3G (NREMS)	6-month-old mice: WT: n= 12 mice; AppNL-G-F/wt: n= 11 mice; AppNL-G-F/NL-G-F: n= 8 mice; 12-month-old mice: WT: n= 10 mice; AppNL-G-F/wt: n= 12 mice; AppNL-G-F/NL-G-F: n= 13 mice	6 months: WT vs AppNL-G-F/wt: t(17.754)=0.478, P=0.883, 95% CI: -2.133, 3.085 WT vs AppNL-G-F/NL-G-F: t(14.074)=2.892, P=0.030, 95% CI: -5.248, -0.264 AppNL-G-F/wt vs AppNL-G-F/NL-G-F: t(16.892)=2.843, P=0.029, 95% CI: -6.169, -0.315 12 months: WT vs AppNL-G-F/wt: t(18.614)=0.983, P=0.596, 95% CI: -3.749, 1.660 WT vs AppNL-G-F/NL-G-F: t(20.994)=6.260, P=0.000, 95% CI: -7.911, -3.369 AppNL-G-F/wt …
	3H (REMS)	6-month-old mice: WT: n= 12 mice; AppNL-G-F/wt: n= 11 mice; AppNL-G-F/NL-G-F: n= 8 mice; 12-month-old mice: WT: n= 10 mice; AppNL-G-F/wt: n= 12 mice; AppNL-G-F/NL-G-F: n= 13 mice	6 months: WT vs AppNL-G-F/wt: t(19.257)=0.988, P=0.593, 95% CI: -3.898, 8.868 WT vs AppNL-G-F/NL-G-F: t(13.675)=0.773, P=0.725, 95% CI: -4.904, 8.997 AppNL-G-F/wt vs AppNL-G-F/NL-G-F: t(15.921)=0.149, P=0.988, 95% CI: -8.015, 7.138 12 months: WT vs AppNL-G-F/wt: t(13.613)=0.308, P=0.949, 95% CI: -6.070, 4.797 WT vs AppNL-G-F/NL-G-F: t(20.172)=2.974, P=0.020, 95% CI: -13.924, -1.128 AppNL-G-F/wt v…
	3I (Wake)	6-month-old mice: WT: n= 12 mice; AppNL-G-F/wt: n= 11 mice; AppNL-G-F/NL-G-F: n= 8 mice; 12-month-old mice: WT: n= 10 mice; AppNL-G-F/wt: n= 12 mice; AppNL-G-F/NL-G-F: n= 13 mice	6 months: WT vs AppNL-G-F/wt: t(20.101)=1.266, P=0.430, 95% CI: -0.154, 0.463 WT vs AppNL-G-F/NL-G-F: t(8.650)=0.312, P=0.948, 95% CI: -0.612, 0.764 AppNL-G-F/wt vs AppNL-G-F/NL-G-F: t(9.280)=0.314, P=0.947, 95% CI: -0.771, 0.614 12 months: WT vs AppNL-G-F/wt: t(19.188)=0.343, P=0.937, 95% CI: -0.360, 0.274 WT vs AppNL-G-F/NL-G-F: t(20.982)=1.128, P=0.508, 95% CI: -0.201, 0.526 AppNL-G-F/wt vs Ap…
	3J (NREMS)	6-month-old mice: WT: n= 12 mice; AppNL-G-F/wt: n= 11 mice; AppNL-G-F/NL-G-F: n= 8 mice; 12-month-old mice: WT: n= 10 mice; AppNL-G-F/wt: n= 12 mice; AppNL-G-F/NL-G-F: n= 13 mice	6 months: WT vs AppNL-G-F/wt: t(20.987)=0.631, P=0.805, 95% CI: -0.107, 0.179 WT vs AppNL-G-F/NL-G-F: t(9.718)=1.886, P=0.194, 95% CI: -0.480, 0.090 AppNL-G-F/wt vs AppNL-G-F/NL-G-F: t(9.338)=2.257, P=0.113, 95% CI: -0.514, 0.053 12 months: WT vs AppNL-G-F/wt: t(19.248)=0.501, P=0.031, 95% CI: -0.374, -0.017 WT vs AppNL-G-F/NL-G-F: t(16.414)=1.791, P=0.000, 95% CI: -0.628, -0.304 AppNL-G-F/wt vs …
	3K (REMS)	6-month-old mice: WT: n= 12 mice; AppNL-G-F/wt: n= 11 mice; AppNL-G-F/NL-G-F: n= 8 mice; 12-month-old mice: WT: n= 10 mice; AppNL-G-F/wt: n= 12 mice; AppNL-G-F/NL-G-F: n= 13 mice	6 months: WT vs AppNL-G-F/wt: t(20.708)=0.1.527, P=0.299, 95% CI: -0.191, 0.047 WT vs AppNL-G-F/NL-G-F: t(9.135)=2.318, P=0.103, 95% CI: -0.508, 0.046 AppNL-G-F/wt vs AppNL-G-F/NL-G-F: t(8.519)=1.625, P=0.287, 95% CI: -0.434, 0.117 12 months: WT vs AppNL-G-F/wt: t(16.272)=2.219, P=0.098, 95% CI: -0.311, 0.023 WT vs AppNL-G-F/NL-G-F: t(15.308)=6.751, P=0.000, 95% CI: -0.588, -0.262 AppNL-G-F/wt vs…
	3L (Wake)	6-month-old mice: WT: n= 12 mice; AppNL-G-F/wt: n= 11 mice; AppNL-G-F/NL-G-F: n= 8 mice; 12-month-old mice: WT: n= 10 mice; AppNL-G-F/wt: n= 12 mice; AppNL-G-F/NL-G-F: n= 13 mice	6 months: WT vs AppNL-G-F/wt: t(20.720)=1.244, P=0.442, 95% CI: -0.006, 0.017 WT vs AppNL-G-F/NL-G-F: t(9.447)=0.994, P=0.598, 95% CI: -0.034, 0.016 AppNL-G-F/wt vs AppNL-G-F/NL-G-F: t(8.750)=1.654, P=0.275, 95% CI: -0.039, 0.010 12 months: WT vs AppNL-G-F/wt: t(19.283)=0.412, P=0.911, 95% CI: -0.019, 0.013 WT vs AppNL-G-F/NL-G-F: t(15.134)=1.535, P=0.303, 95% CI: -0.022, 0.006 AppNL-G-F/wt vs Ap…
	3M (NREMS)	6-month-old mice: WT: n= 12 mice; AppNL-G-F/wt: n= 11 mice; AppNL-G-F/NL-G-F: n= 8 mice; 12-month-old mice: WT: n= 10 mice; AppNL-G-F/wt: n= 12 mice; AppNL-G-F/NL-G-F: n= 13 mice	6 months: WT vs AppNL-G-F/wt: t(20.824)=0.167, P=0.485, 95% CI: -0.002, 0.005 WT vs AppNL-G-F/NL-G-F: t(12.270)=0.982, P=0.601, 95% CI: -0.007, 0.003 AppNL-G-F/wt vs AppNL-G-F/NL-G-F: t(9.418)=1.861, P=0.196, 95% CI: -0.009, 0.002 12 months: WT vs AppNL-G-F/wt: t(18.129)=2.853, P=0.027, 95% CI: -0.008, 0.000 WT vs AppNL-G-F/NL-G-F: t(13.580)=7.765, P=0.000, 95% CI: -0.013, -0.007 AppNL-G-F/wt vs …
	3N (REMS)	6-month-old mice: WT: n= 12 mice; AppNL-G-F/wt: n= 11 mice; AppNL-G-F/NL-G-F: n= 8 mice; 12-month-old mice: WT: n= 10 mice; AppNL-G-F/wt: n= 12 mice; AppNL-G-F/NL-G-F: n= 13 mice	6 months: WT vs AppNL-G-F/wt: t(20.222)=0.349, P=0.935, 95% CI: -0.017, 0.013 WT vs AppNL-G-F/NL-G-F: t(10.956)=3.317, P=0.017, 95% CI: -0.061, -0.006 AppNL-G-F/wt vs AppNL-G-F/NL-G-F: t(9.418)=3.253, P=0.023, 95% CI: -0.059, -0.005 12 months: WT vs AppNL-G-F/wt: t(17.087)=1.696, P=0.235, 95% CI: -0.037, 0.008 WT vs AppNL-G-F/NL-G-F: t(13.162)=6.634, P=0.000, 95% CI: -0.072, -0.031 AppNL-G-F/wt v…
	3O (REMS)	6-month-old mice: WT: n= 12 mice; AppNL-G-F/wt: n= 11 mice; AppNL-G-F/NL-G-F: n= 8 mice; 12-month-old mice: WT: n= 10 mice; AppNL-G-F/wt: n= 12 mice; AppNL-G-F/NL-G-F: n= 13 mice	6 months: WT vs AppNL-G-F/wt: t(19.669)=1.314, P=0.404, 95% CI: -0.359, 1.134 WT vs AppNL-G-F/NL-G-F: t(15.990)=1.647, P=0.256, 95% CI: -1.181, 0.261 App NL-G-F/wt vs AppNL-G-F/NL-G-F: t(16.873)=2.728, P=0.036, 95% CI: -1.645, -0.050 12 months: WT vs AppNL-G-F/wt: t(14.488)=0.589, P=0.828, 95% CI: -1.116, 0.704 WT vs AppNL-G-F/NL-G-F: t(13.438)=3.976, P=0.004, 95% CI: -2.243, -0.457 AppNL-G-F/wt …
