# Supplementary material for: Progressive Changes in Sleep and Its Relations to Amyloid-β Distribution and Learning in Single App Knock-In Mice
Source: eNeuro. 2020 Apr 29;7(2):ENEURO.0093-20.2020. doi: 10.1523/ENEURO.0093-20.2020 (PMC7196722; doi:10.1523/ENEURO.0093-20.2020)
Supplement: Extended Data Figure 5-1 — Detailed results of the statistical analyses in Figure 5. Download Figure 5-1, XLSX file. [file enu-eN-NWR-0093-20-s06.xlsx]

## Sheet: Extended Data Figure 5-1
	Extended Data Figure 5-1. Detailed results of the statistical analyses in Figure 5.
	Figure number	Sample size (n)	Mixed ANOVA	Games-Howell
	5A 7-month-old mice	WT: n= 12 mice; AppNL-G-F/wt: n= 9 mice; AppNL-G-F/NL-G-F: n= 8 mice	period: F(1, 26)= 214.701, P=0.000 period*genotype: F(2,26)= 0.501, P=0.612 genotype: F(2,26)= 0.715, P=0.499	n.a.
	5A 13-month-old mice	WT: n= 9 mice; AppNL-G-F/wt: n= 10 mice; AppNL-G-F/NL-G-F: n= 11 mice	period: F(1,26)= 410.560 , P=0.000 period*genotype: F(2,28)= 410.560, P=0.309 genotype: F(2,28)= 0.807, P=0.456	n.a.
	5B 7-month-old mice	WT: n= 12 mice; AppNL-G-F/wt: n= 9 mice; AppNL-G-F/NL-G-F: n= 8 mice	CS: F(4,104)= 36.555, P= 0.000 CS*genotype: F(8,104)= 1.041, P= 0.411 genotype: F(2,26)= 0.968, P=0.393	n.a.
	5B 13-month-old mice	WT: n= 9 mice; AppNL-G-F/wt: n= 11 mice; AppNL-G-F/NL-G-F: n= 11 mice	CS: F(4,112)= 32.333, P= 0.000 CS*genotype: F(8,112)=2.976, P= 0.005 genotype : F(2,28)= 5.932, P=0.007	WT vs AppNL-G-F/wt: CS1: t(18.000)=0.787, P=0.716, 95% CI: -12.912, 24.415 CS2: t(17.584)=0.554, P=0.846, 95% CI: -28.907, 44.901 CS3: t(17.931)=0.646, P=0.797, 95% CI: -35.258, 21.013 CS4: t(15.013)=1.123, P=0.515, 95% CI: -42.412, 16.802 CS5: t(15.997)=3.065, P=0.019, 95% CI: -53.243, -4.570 WT vs AppNL-G-F/NL-G-F: CS1: t(17.242)=0.897, P=0.649, 95% CI: -13.955, 28.985 CS2: t(14.610)=1.514, P=0…
	5C	7-month-old mice: WT: n= 12 mice; AppNL-G-F/wt: n= 9 mice; AppNL-G-F/NL-G-F: n= 8 mice; 13-month-old mice: WT: n= 9 mice; AppNL-G-F/wt: n= 10 mice; AppNL-G-F/NL-G-F: n= 11 mice	n.a.	7 months: WT vs AppNL-G-F/wt: t(17.146)=1.611, P=0.268 95% CI: -42.927, 9.788 WT vs AppNL-G-F/NL-G-F: t(17.503)=2.645, P=0.042, 95% CI: -41.477, -0.689 AppNL-G-F/wt vs AppNL-G-F/NL-G-F: t(12.435)=0.501, P=0.872, 95% CI: -28.438, 19.410 13 months: WT vs AppNL-G-F/wt: t(12.774)=0.993, P=0.594, 95% CI: -46.229, 21.001 WT vs AppNL-G-F/NL-G-F: t(9.790)=2.093, P=0.142, 95% CI: -56.472, 7.674 AppNL-G-F/…
